# Supplementary material for: Primordial and 244Pu-derived xenon missing from Earth's convecting mantle
Source: Research Square preprint supplement (doi:10.21203/rs.3.rs-2890006/v1), 2023-05-24
Supplement: Supplementary file 1 [file 7cb1394c96d2baf802ab7134.xlsx]

## Sheet: magma ocean model
		parameters to modify			age solar system	4568000000
		outputs
	Critical parameters			Summary
	batch = 1 fractional = 0	1		hadean crust thickness	40.0259	km
	cristalization rate 2.5-0 Gpa	0.595		hadean crust U conc	1.32051	ppm
	Trapped melt fraction (%)	0		equivalent present-day mantle U	4.56789	ppb
	hadean crust extraction (Myr after CAI)	170		UM depletion factor	27.0228	%
	% modal CaPv > 22 Gpa	1		net mantle U balance since onset subd. (mol/yr)	3.21461e+08	today: 1.96E+07
	Magma ocean crystallisation model							Fractional crystallization
	Partition coefficients	D(U)	D(Th)	Ref	Note
	bridgmanite	0.033	0.006	Corgne et al. - ref 96	H2020a
	calcium perovskite	15	18	Corgne et al. - ref 96	H2020b
	majorite	0.02	0.017	Corgne & Wood - ref 97	preferred value
	garnet	0.0277	0.0098	Salters & Longhi - ref 95	average value
	clinopyroxene	0.0075	0.0067	Salters & Longhi - ref 95	average value
	orthopyroxene	0.0023	0.0007	Salters & Longhi - ref 95	average value
	olivine	0	0		Assumed
	feldspath	0	0		Assumed
	spinel	0.00011	0.00017	Beattie - ref 94
	Trapped melt	1	1
	Mineralogical Assemblages	A	B	C	D	E
		> 22 Gpa	22-18 Gpa	18-15 Gpa	15-2.5 Gpa	2.5-0 Gpa
	Ol		0.45	0.4	0.5	0.5
	CaPv	0.01
	Bg	0.98
	Fp	0.01
	Maj		0.55	0.25
	Grt				0.1
	Cpx			0.35	0.2	0.2
	Sp					0.1
	Opx				0.2	0.2
	Bulk Ds
	U	0.18234	0.011	0.007625	0.00473	0.001971
	Th	0.18588	0.00935	0.006595	0.00246	0.001497
	Bulk Ds+trapped liquid	0
	fraction trapped	0	0	0	0	0
	U	0.18234	0.011	0.007625	0.00473	0.001971
	Th	0.18588	0.00935	0.006595	0.00246	0.001497
	Composition of cumulates and liquids	> 22 Gpa	22-18 Gpa	18-15 Gpa	15-2.5 Gpa	2.5-0 Gpa		2.5-0 Gpa
	X (Mass fraction crystallized, wt%)	0.5	0.2	0.2	0.8	0.595
	Mass residual liquid (g)	2.02602e+27	9.07657e+26	7.26125e+26	1.45225e+26	5.88161e+25
	% left liquid	50	22.4	17.92	3.584	1.45152
			residual liquid / BSE
	Mass SMO (residual liquid, g)	1.13457e+27	0.28
	Mass BMO (residual liquid, g)	8.91448e+26	0.22
	Cumulate (ppm)							Cumulate (ppm)
	U	0.0128145	0.000963675	0.000833414	0.00253695	0.00260272		0.0016045
	Th	0.0249224	0.00156338	0.00137614	0.00254156	0.00381046		0.00234791
	Th/U	1.94485	1.62231	1.6512	1.00181	1.46403		1.46333
	Liquid (ppm)							Liquid (ppm)
	U	0.0702782	0.0876068	0.1093	0.536353	1.32051		1.32197
	Th	0.134078	0.167206	0.208664	1.03315	2.5454		2.54754
	Th/U	1.90781	1.9086	1.90909	1.92625	1.92759		1.92708
	reservoirs	vol (m3)	radius (km)	radius (m)
	external radius crust	1.0827e+21	6370	6370000
	internal radius crust	1.06242e+21	6329.97	6.32997e+06
	core-mantle radius	1.76685e+20	3481	3481000
		vol (m3)	mass (g)	thickness hadean crust (km)
	Hadean crust	2.02814e+19	5.88161e+25	40.0259
	BSE	9.06012e+20	4.05204e+27
	Mass total mantle		3.99322e+27
	Mass convecting mantle		3.10177e+27
	Mass lower mantle (PLM)		8.91448e+26
			density crust (kg/m3)	2900
	Intial, t=0
	Uranium		Plutonium
	present-day BSE content (ppm)	0.021	(Pu/U) initial	0.0068
	Molar mass	237.99	Molar mass	244
	T1/2 U (yr)	4468000000	T1/2 Pu (yr)	82000000
	U initial (mol)	7.26276e+17	Pu initial (mol)	4938675726245744
	Extraction Hadean crust
			time after CAI (yr)		170000000
	mol U left to decay @Td	7.07372e+17	U concentration BSE @Td (mol/g)		1.74572e-10
	mol Pu left to decay	1173610360942230	U concentration BSE@Td (ppm)		0.0415464
	U concentration hadean crust (ppm)	1.32051	equivalent present-day U (ppm)		0.667462
	mass U in BMO (g)	6.26494e+19	mass U hadean crust		7.7667e+19
	mol U in BMO (g)	2.63244e+17	mol U hadean crust (g)		3.26346e+17
	mol U convecting mantle	1.17782e+17	U content convecting mantle (ppb)		9.03711
	mass of U convecting mantle (U)	2.80311e+19	equivalent present-day U (ppb)		4.56789
	mol U primitive convecting mantle	4.35863e+17	convecting mantle U depletion factor		0.270228
	% U BSE in BMO	0.372143	% U (BSE-BMO) in crust		0.734801
	% U BSE in convecting mantle	0.166507	% U (BSE-BMO) in mantle		0.265199
	% U BSE in crust	0.461349	factor of mantle U increase		2.79858
	Present day bulk mantle U content (following approch by Tissot et al. 2015)
	mol U left to decay today	3.57548e+17	mass U left to decay (g)		8.50928e+19
	Total mass crust (g)	2.4e+25	present U content cont. crust (ppm)		1.4
	Total mass U crust (g)	3.36e+19	Total mass U in mantle (g)		5.14928e+19
	mol U crust	1.41182e+17	mol U mantle		2.16365e+17
			bulk U conc mantle (ppb)		12.7836
	Present day rate of subduction (after Nielsen 2010)
	time onset subduction (yr ago)	3000000000	net mantle U balance since onset subd. (mol/yr)		3.21461e+08
	Mass subd. material (g/yr)	6.13e+16	Mass U subd. (g/yr)		7356000000
	U content subd. material (ppm)	0.12	Flux subd. U (mol/yr)		3.09089e+07
	vol emitted MORBS (m3/yr)	20000000000	U content N-MORB (ppb)		50
	density MORB (kg/m3)	2700	Mass U MORB (g/yr)		2700000000
	mass emitted N-MORBS (g/yr)	5.4e+16	Flux MORB U (mol/yr)		1.1345e+07
			present day net mantle U increase (mol/yr)		1.95638e+07
	mol U extracted convection	4.98954e+16
	mol U subducted	7.78903e+17	factor subduction efficiency	8.4
	mantle U balance since onset subd. (mol/yr)	1.65759e+08	0.515643

## Sheet: Mass balance
	depth (km)	Radius (km)	P (Gpa)	Melt volume (km3)	Volume initial	gradient (Gpa/km)	density	Mass of reservoirs (kg)		X (mass)	X (volume)
CMB	2891	3487	135.877	9.09154e+11		0.047
LM	660	5718	23.1	6.05488e+11	9.09154e+11	0.035	4840	2.93056e+24		72.3232	66.5991
TZ1	520	5858	18.2	5.89391e+10	3.03665e+11	0.035	3750	2.21022e+23		19.7081	19.4092
TZ2	410	5968	14.35	4.83301e+10	2.44726e+11	0.035	3750	1.81238e+23		20.1274	19.7486
Gt field	80	6298	2.4	1.56013e+11	1.96396e+11	0.03	3750	5.8505e+23		81.3457	79.4381
Sp field	40	6338	1.2	2.0064e+10	4.03829e+10	0.03	3750	7.524e+22		56.0803	49.6844
croute	0	6378	0	2.03189e+10			2900	5.89247e+22
Note: Pressure-depth "gradient" is adjusted to obtain the correct P at a given depth							Total	4.05204e+24
							LM	2.93056e+24
							UM	1.06255e+24
