# Supplementary material for: Primordial and 244Pu-derived xenon missing from Earth's convecting mantle
Source: Research Square preprint supplement (doi:10.21203/rs.3.rs-2890006/v1), 2023-05-24
Supplement: Supplementary file 2 [file bb7cbb11193616234a9b49af.xlsx]

## Sheet: Carbonaceous Kr
	Sample	Type	Extraction	78/84	er	80/84	er	82/84	er	83/84	er	86/84	er
	Okazaki, R., & Nagao, K. (2017). Primordial and cosmogenic noble gases in the Sutter's Mill CM chondrite. Meteoritics & Planetary Science, 52(4), 669-689.
	Sutters Mill	CM	600°C	0.00622	0.00049	0.03805	0.00099	0.1976	0.0049	0.2021	0.0049	0.3114	0.0048
			900°C	0.0054	0.001	0.0372	0.0022	0.1884	0.0044	0.1957	0.0044	0.3073	0.0071
			1200°C	0.00543	0.00047	0.03734	0.00062	0.1917	0.0049	0.1995	0.0049	0.3116	0.0053
			1800°C	0.00571	0.00025	0.0372	0.00095	0.1943	0.0029	0.1981	0.0029	0.3112	0.0039
			Bulk	0.00566	0.00022	0.03735	0.00053	0.1934	0.0022	0.1988	0.0021	0.311	0.0026
	Sutters Mill		350°C	0.00605	0.00049	0.0383	0.00046	0.1969	0.0031	0.1999	0.0041	0.3049	0.0034
			500°C	0.0063	0.001	0.03791	0.00391	0.1951	0.0093	0.2	0.0052	0.3081	0.0099
			650°C	0.00525	0.00112	0.04074	0.00144	0.193	0.0068	0.2006	0.0077	0.3101	0.0151
			800°C	0.0061	0.0007	0.0382	0.0015	0.196	0.005	0.2	0.004	0.313	0.006
			1000°C	0.00569	0.00023	0.0383	0.0012	0.1962	0.0022	0.2021	0.0029	0.3102	0.0041
			1200°C	0.00564	0.00022	0.038	0.001	0.1963	0.0019	0.2013	0.0024	0.3113	0.0036
			1400°C	0.00581	0.00017	0.0376	0.0013	0.1979	0.004	0.1993	0.0016	0.3102	0.0035
			1800°C	0.00629	0.00036	0.0383	0.0011	0.1945	0.0051	0.2011	0.0017	0.3106	0.0054
			Bulk	0.00581	0.00012	0.03808	0.00051	0.1964	0.0014	0.2007	0.0011	0.3101	0.0017
	Sutters Mill Etched		600°C	0.00585	0.0005	0.0372	0.0016	0.1925	0.0039	0.199	0.0059	0.3094	0.005
			900°C	0.0056	0.00034	0.0371	0.0019	0.1977	0.0036	0.2011	0.0032	0.3135	0.0026
			1200°C	0.00554	0.00038	0.0353	0.001	0.1855	0.0043	0.1966	0.0024	0.3256	0.0031
			1800°C	0.00552	0.00027	0.0367	0.0014	0.1944	0.0039	0.1994	0.0021	0.3208	0.0029
			Bulk	0.00562	0.0002	0.03643	0.00071	0.1914	0.0021	0.1986	0.0019	0.3183	0.0019
	Marti, K. (1967). Trapped xenon and the classification of chondrites. Earth and Planetary Science Letters, 2(3), 193-196.
	Murray	CM	Bulk	0.00594427	8.57053e-05	0.0393808	0.000524522	0.200619	0.00198479	0.201238	0.00175678	0.309598	0.00191701
	Lance	CO	Bulk	0.00591331	0.000107903	0.0394737	0.000591676	0.200619	0.00263109	0.201548	0.0024291	0.309598	0.00287552
	Felix	CO	Bulk	0.00611111	0.000108513	0.0444444	0.000741883	0.203086	0.0026392	0.201235	0.00241936	0.308642	0.0028578
	Eugster, O., Eberhardt, P., & Geiss, J. (1967). Krypton and xenon isotopic composition in three carbonaceous chondrites. Earth and Planetary Science Letters, 3, 249-257.
	Cold Blokkeveld	CM	Bulk	0.00603908	-	0.039299	0.00566098	0.202357	0.00554672	0.202885	0.00553682	0.310174	0.000962077
	Cold Blokkeveld	CM	Bulk	0.0059431	-	0.0389301	0.00636197	0.200557	0.0068989	0.20068	0.00556137	0.309215	0.000956137
	Cold Blokkeveld	CM	Bulk	0.00596291	-	0.0386399	0.00588236	0.201391	0.00458105	0.202442	0.00570494	0.309119	0.0010511
	Cold Blokkeveld	CM	Bulk			0.0394566	0.0143	0.201173	0.00807658	0.200957	0.0080816	0.308737	0.00162042
	Cold Blokkeveld	CM	Bulk	0.00598203	-	0.0393123	0.00721256	0.200774	0.00900623	0.201084	0.00771803	0.309789	0.00143954
	Cold Blokkeveld	CM	Bulk			0.0392248	0.0100474	0.20186	0.00820758	0.202016	0.00772418	0.310078	0.00192296
	Lance	CO	Bulk	0.00601117	-	0.0395782	0.0115859	0.201675	0.0071903	0.201582	0.00719273	0.310174	0.00115449
	Oregueil	CI	Bulk	0.00590444	-	0.0393422	0.0106867	0.201738	0.00790512	0.202048	0.00789777	0.31027	0.00154028
	Nagao, K., Inoue, K., & Ogata, K. (1984). Primordial rare gases in Belgica-7904 (C2) carbonaceous chondrite.
	Belgica 7904	CM	700	0.00593	0.00023	0.0404	0.0006	0.2029	0.0012	0.2021	0.003	0.3066	0.0027
			900	0.00602	0.00027	0.0395	0.0017	0.1996	0.004	0.203	0.0047	0.3091	0.0036
			1100	0.00617	0.00013	0.0396	0.0004	0.203	0.002	0.2026	0.0016	0.3067	0.0026
			1300	0.00602	0.00019	0.0394	0.0004	0.2033	0.0016	0.2018	0.0015	0.3077	0.0019
			1500	0.00615	0.00021	0.0395	0.0014	0.2044	0.0018	0.2041	0.0012	0.3103	0.0028
			1800	0.00588	0.00068	0.0387	0.0011	0.1946	0.0048	0.1967	0.004	0.297	0.0077
	Bekaert, D. V., Marrocchi, Y., Meshik, A., Remusat, L., & Marty, B. (2019). Primordial heavy noble gases in the pristine Paris carbonaceous chondrite. Meteoritics & planetary science, 54(2), 395-414.
	Paris	CM	Bulk			0.0395	0.0003	0.2022	0.001	0.2018	0.001	0.3087	0.001
			Bulk			0.0394	0.0003	0.2021	0.0007	0.2019	0.0014	0.3094	0.0012
			Bulk			0.0396	0.0002	0.2019	0.0009	0.2024	0.0005	0.3088	0.0015
			Bulk			0.0396	0.0002	0.2019	0.0011	0.2019	0.0003	0.3095	0.001
	Manuel, O. K., Hennecke, E. W., & Sabu, D. D. (1972). Xenon in carbonaceous chondrites. Nature Physical Science, 240, 99-101.
	Mokoia		200°C
			400°C			0.0398418	0.00155548	0.205292	0.00486355	0.203163	0.0037384	0.304136	0.00249747
			600°C			0.0387175	0.00125357	0.201452	0.00373924	0.199032	0.00320197	0.30248	0.00256184
			750°C			0.0393798	0.000653975	0.19907	0.00269344	0.20155	0.00416867	0.310078	0.00163452
			1000°C			0.03949	0.000722807	0.200249	0.00286828	0.200249	0.0026401	0.310945	0.00290061
			1200°C			0.0409661	0.000643432	0.20483	0.00182768	0.20483	0.00182768	0.305717	0.00149541
			1400°C			0.0402601	0.000663144	0.203159	0.00172151	0.203778	0.00195845	0.309693	0.00182229
			1600°C			0.038817	0.0013134	0.203019	0.00547221	0.200246	0.00518167	0.308071	0.00360651
			Bulk			0.040184	0.00065668	0.202761	0.00218721	0.202454	0.00218625	0.306748	0.0017878
	Allende		200°C			0.0392638	0.000700076	0.202761	0.00407216	0.201534	0.00434721	0.306748	0.00263465
			400°C			0.041564	0.0015897	0.197044	0.00360777	0.196736	0.00309717	0.307882	0.00293853
			600°C			0.0527786	0.0152186	0.210494	0.00327022	0.20801	0.00352958	0.310463	0.00250606
			750°C			0.0802354	0.00533779	0.211896	0.00490801	0.201053	0.00569977	0.309789	0.00335893
			1000°C			0.101911	0.00423185	0.216879	0.0048329	0.19586	0.00536665	0.318471	0.00273845
			1200°C			0.0540209	0.000631752	0.208717	0.00108643	0.203806	0.00135068	0.306937	0.000847892
			1400°C			0.0460303	0.000644918	0.204819	0.00231366	0.203584	0.00148171	0.308928	0.00124067
			1600°C			0.0498014	0.00158193	0.203789	0.00604359	0.199817	0.00487037	0.30553	0.00252041
			Bulk			0.0528743	0.000645015	0.207808	0.00144902	0.203504	0.00171057	0.307409	0.001134
